# Supplementary material for: Anti-proliferative and anti-inflammatory activities of the sea cucumber Holothuria polii aqueous extract
Source: PubMed Central journal article supplement — SAGE Open Med. 2018 Nov 2;6:2050312118809541. doi: 10.1177/2050312118809541 (PMC6236865; doi:10.1177/2050312118809541), 2018-11-02
Supplement: Supplemental_Figures_(1).pdf [file Supplemental_Figures_%281%29.pdf]

## Supplementary Figure 1

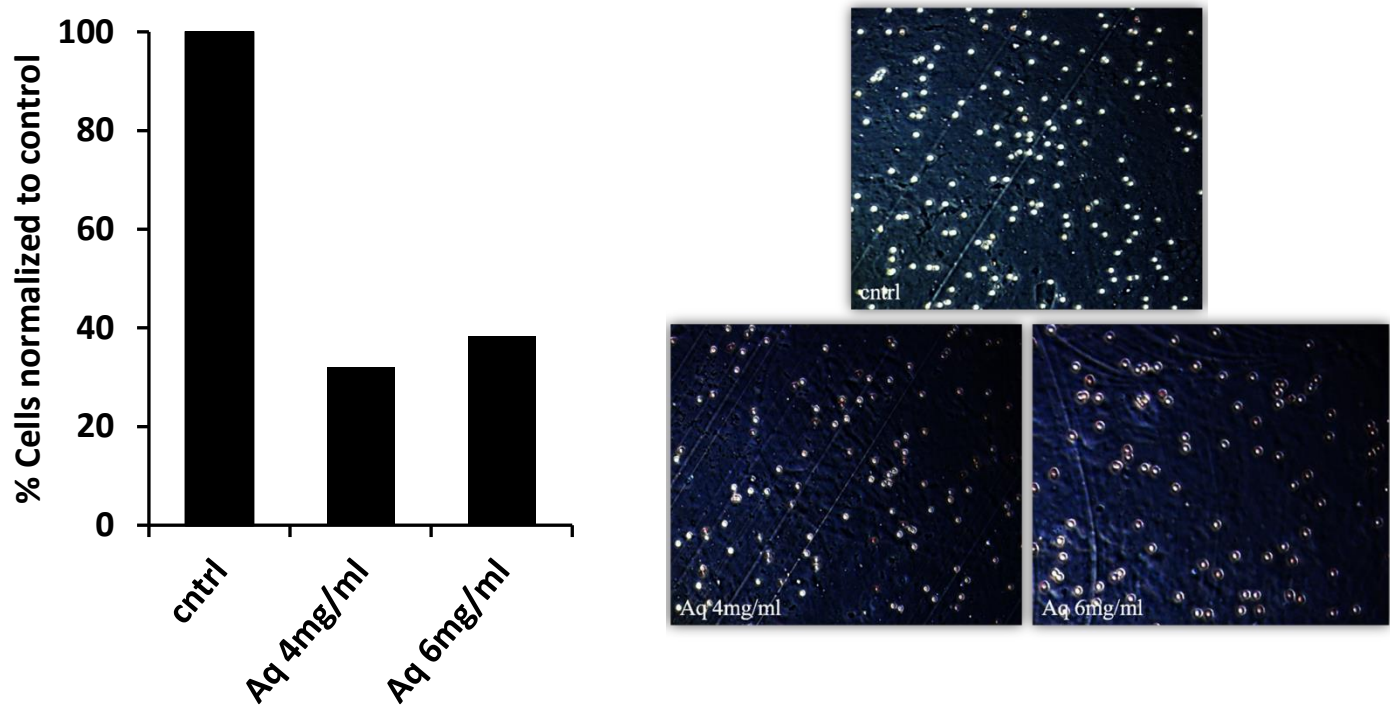

**Supplementary figure 1: Effect of Aq fraction on trans-well invasion potential of MDA-MB-231.** (A) Histogram analysis of cntrl and Aq treated cells showing around 70% decrease in invasion of Aq treated cells at 4mg/ml and 6mg/ml compared to cntrl through Matrigel diluted 1:20 in cell culture media. (B) Representative phase contrast images, at low power, of cntrl and Aq treated MDA-MB-231 cells that invaded through the Matrigel (diluted 1:20). Cells that invaded across the Matrigel layer from 10 random fields per well were counted (N=1).

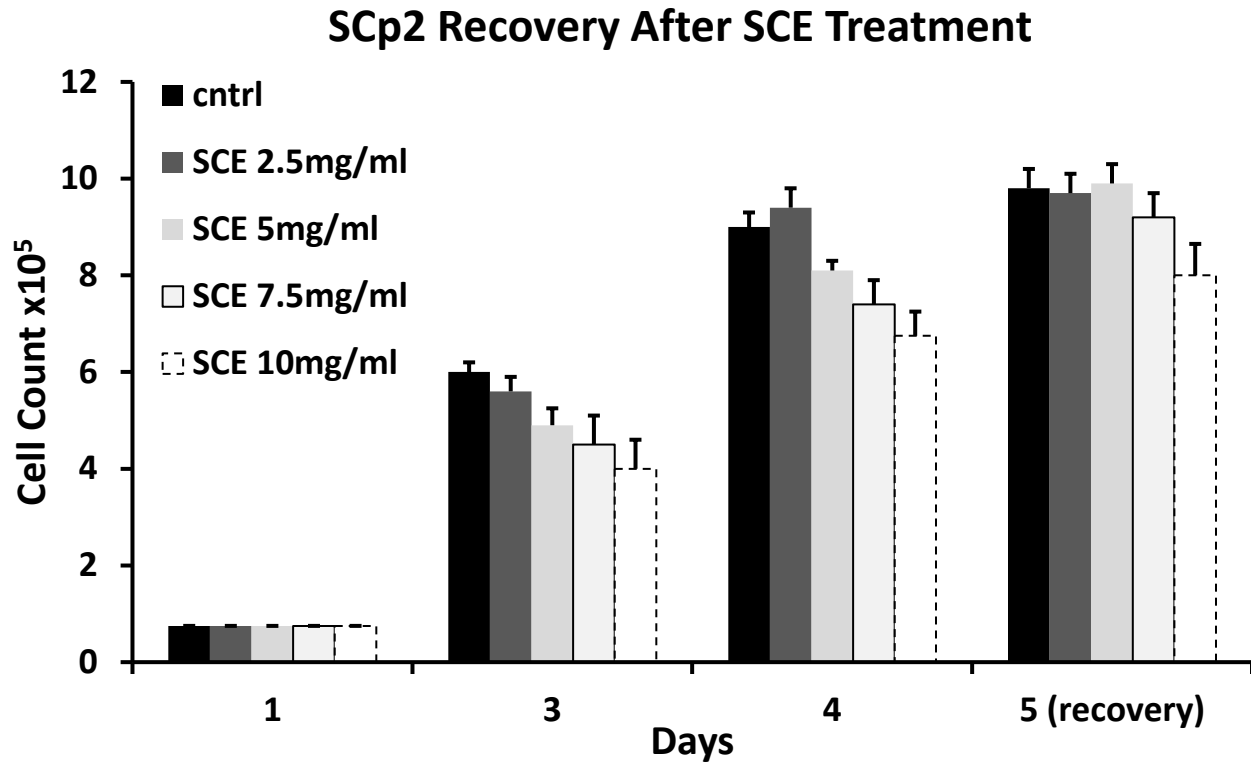

**Supplementary figure 2: Effect of SCE treatment on the proliferation of SCp2 cells.** Growth analysis by trypan blue showed no effect by SCE at 2.5mg/ml on day 4 and approximately 10, 18, and 30% decrease at 5, 7.5, and 10mg/ml respectively. Cells treated with 5 and 7.5mg/ml show total recovery while 10mg/ml show partial recovery within one day (at day 5) after treatment washout. Samples were run in triplicate wells (N=1) and represented as cell counts  $\pm$  S.D.
